# Supplementary material for: Transreplication Preference of the Tomato Leaf Curl Joydebpur Virus for a Noncognate Betasatellite through Iteron Resemblance on Nicotiana bethamiana
Source: MDPI journal article supplement (doi:10.3390/microorganisms11122907), 2023-12-01
Supplement: s1 [file s1]

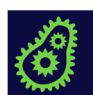

## Article

# Transreplication Preference of the Tomato Leaf Curl Joydebpur Virus for a Noncognate Betasatellite through *Iteron* Resemblance on *Nicotiana bethamiana*

Thuy T. B. Vo <sup>1,†</sup>, I Gusti Ngurah Prabu Wira Sanjaya <sup>1,†</sup>, Eui-Joon Kil <sup>2</sup>, Aamir Lal <sup>2</sup>, Phuong T. Ho <sup>1</sup>, Bupi Nattanong <sup>1</sup>, Marjia Tabassum <sup>1</sup>, Muhammad Amir Qureshi <sup>1</sup>, Taek-Kyun Lee <sup>3,\*</sup> and Sukchan Lee <sup>1,\*</sup>

<sup>1</sup> Department of Integrative Biotechnology, Sungkyunkwan University, Suwon 16419, Republic of Korea; bichthuy251188@gmail.com (T.T.B.V.); gusti.prabu20@gmail.com (I.G.N.P.W.S.); hophuongk59sinhhoc@gmail.com (P.T.H.); gum.bupi@gmail.com (N.B.); marjia39@g.skku.edu (M.T.); amirq303@gmail.com (M.A.Q.)

<sup>2</sup> Department of Plant Medicals, Andong National University, Andong 36729, Republic of Korea; viruskil@anu.ac.kr (E.-J.K.); aamirchaudhary43@gmail.com (A.L.)

<sup>3</sup> Risk Assessment Research Center, Korea Institute of Ocean Science & Technology, Geoje 53201, Republic of Korea

\* Correspondence: tklee@kiost.ac.kr (T.-K.L.); cell4u@skku.edu (S.L.); Tel.: +82-31-290-7866 (S.L.)

† These authors contributed equally to this work.

## Supplementary Materials

**Table S1.** Primer sets used to construct infectious clone.

| Primer        | Sequence 5'-3'             | Target size |
|---------------|----------------------------|-------------|
| ToLCJoV-IC1-F | CTCGAGTGACTTGGTCAATCGGTGTC | 1600 bp     |
| ToLCJoV-IC1-R | CTGCAGCTCAGGCCGAGAAT       |             |
| ToLCJoV-IC2-F | CTGCAGTGATGGGTTCCCT        | 1517 bp     |
| ToLCJoV-IC2-R | AGATCTACACCTAAAACCGTGAACG  |             |

**Table S2.** Sequence comparison of different ToLCJoVs compared with the ToLCJoV isolated in this study.

| Acc No.  | ToLCJoV | C1     | C2     | C3     | C4     | V1     | V2     | IR     |
|----------|---------|--------|--------|--------|--------|--------|--------|--------|
| MK330665 | 96.09%  | 94.66% | 96.79% | 98.02% | 98.98% | 96.63% | 98.68% | 96.63% |
| JN176565 | 92.03%  | 90.37% | 94.32% | 93.82% | 90.17% | 97.12% | 99.33% | 84.54% |
| JX311468 | 91.37%  | 92.1%  | 95.56% | 93.33% | 92.66% | 92.38% | 91.75% | 87.76% |
| EU431116 | 98.41%  | 97.88% | 99.01% | 99.26% | 98.64% | 98.7%  | 98%    | 97.98% |

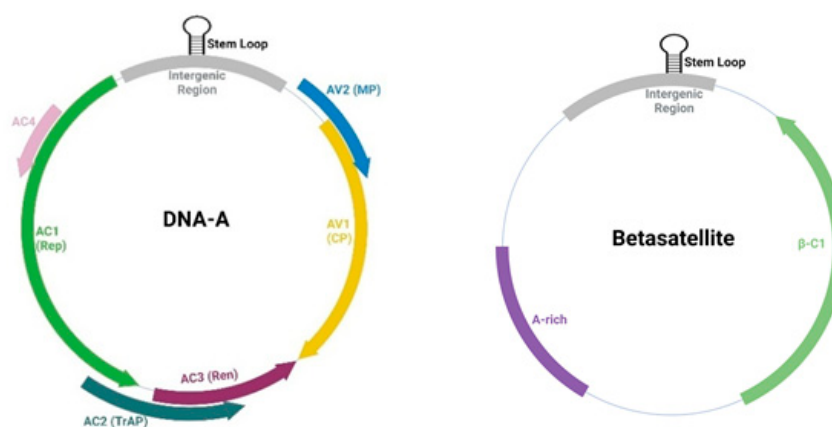

**Figure S1.** Genomic structure of ToLCJoV and ToLCBB. ToLCJoV including 6 ORFs encode for different viral proteins including Rep, TrAP, Ren, MP, CP and AC4. ToLCBB comprise  $\beta$ -C1 gene together with A-rich region.
